# Supplementary material for: Structural and Thermal Investigations of Co(II) and Ni(II) Coordination Polymers Based on biphenyl-4,4′-dioxydiacetate Linker
Source: MDPI journal article supplement (doi:10.3390/ma14133545), 2021-06-25
Supplement: s1 [file s1]

# Structural and Thermal Investigations of Co(II) and Ni(II) Co-ordination Polymers Based on biphenyl-4,4'-dioxydiacetate Linker

Halina Głuchowska <sup>1,\*</sup>, Renata Łyszczek <sup>1,\*</sup>, Liliana Mazur <sup>1</sup> and Alexander M. Kirillov <sup>2,3</sup>

<sup>1</sup> Department of General and Coordination Chemistry and Crystallography, Institute of Chemical Sciences, Faculty of Chemistry, Maria Curie-Skłodowska University in Lublin, M.C. Skłodowskiej Sq. 2, 20-031 Lublin, Poland; liliana.mazur@poczta.umcs.lublin.pl

<sup>2</sup> Centro de Química Estrutural and Departamento de Engenharia Química, Instituto Superior Técnico, Universidade de Lisboa, Av. Rovisco Pais, 1049-001 Lisbon, Portugal; kirillov@tecnico.ulisboa.pt

<sup>3</sup> Research Institute of Chemistry, Peoples' Friendship University of Russia (RUDN University), 6 Miklukho-Maklaya st., Moscow 117198, Russia

\* Correspondence: halina.gluchowska@poczta.umcs.lublin.pl (H.G.); renata.lyszczek@poczta.umcs.lublin.pl (R.L.); Tel.: +48-81-537-57-40

**Table S1.** Geometries of hydrogen bonds and selected short contacts for studied structures.

| Interaction                 | $d_{D-H}$ (Å) | $d_{H...A}$ (Å) | $d_{D...A}$ (Å) | $\angle D-H...A$ (°) | Symmetry code        |
|-----------------------------|---------------|-----------------|-----------------|----------------------|----------------------|
| Compound 1                  |               |                 |                 |                      |                      |
| O1W–H1W...O3 <sup>c</sup>   | 0.75(3)       | 2.40(3)         | 3.098(3)        | 157(3)               | (e) x, -y+0.5, z+0.5 |
| O1W–H2W...O1 <sup>c</sup>   | 0.94(5)       | 2.37(5)         | 3.005(4)        | 125(4)               |                      |
| O1W–H2W...O2 <sup>c</sup>   | 0.94(5)       | 1.89(5)         | 2.737(4)        | 149(4)               | (c) -x, -y+1, -z+1   |
| C2–H2a...O1W <sup>h</sup>   | 0.97          | 2.52            | 3.418(4)        | 153                  | (h) x, y, z-1        |
| Compound 2                  |               |                 |                 |                      |                      |
| O1W–H1W1...O2 <sup>f</sup>  | 0.77(3)       | 1.96(3)         | 2.700(3)        | 160(3)               | (f) -x+2, -y, -z+1   |
| O1W–H2W1...O1 <sup>g</sup>  | 0.79(3)       | 2.24(3)         | 2.851(3)        | 135(3)               | (g) -x+1, -y+1, -z+1 |
| O1W–H2W1...O3 <sup>g</sup>  | 0.79(3)       | 2.25(3)         | 2.979(3)        | 153(3)               |                      |
| O2W–H2W2...O1W <sup>g</sup> | 0.87(3)       | 2.04(3)         | 2.823(3)        | 149(3)               |                      |
| O2W–H1W2...O2 <sup>d</sup>  | 0.83(4)       | 1.88(4)         | 2.681(3)        | 163(3)               | (d) -x+2, -y+1, -z+1 |
| O2W–H2W2...O2W <sup>g</sup> | 0.87(4)       | 2.63(4)         | 3.052(3)        | 111(3)               | (g) -x+1, -y+2, -z+1 |

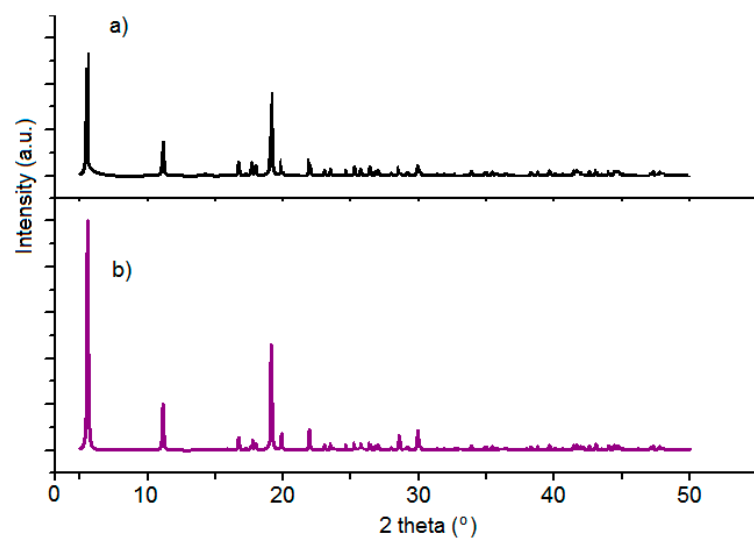

**Figure S1.** Powder X-ray diffraction patterns of 1: (a) experimental, (b) calculated.

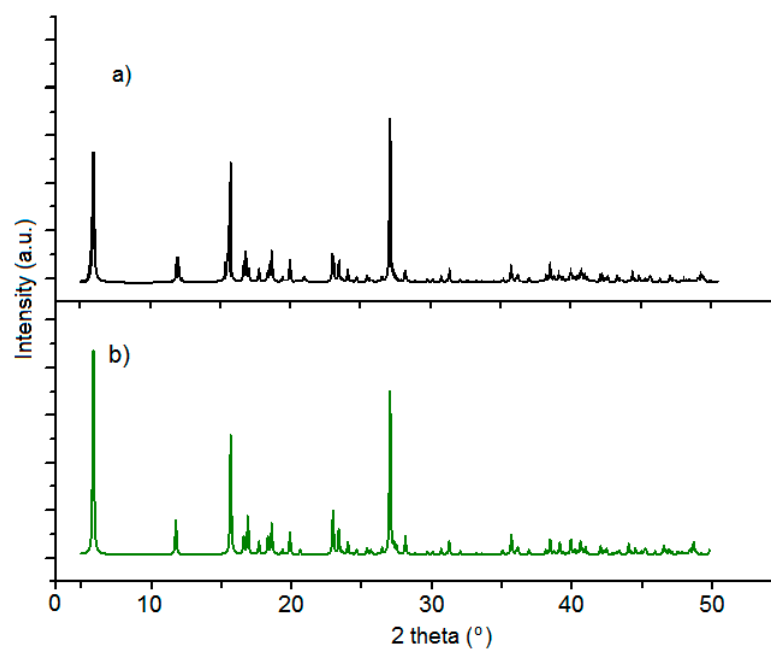

**Figure S2.** Powder X-ray diffraction patterns of 2: (a) experimental, (b) calculated.

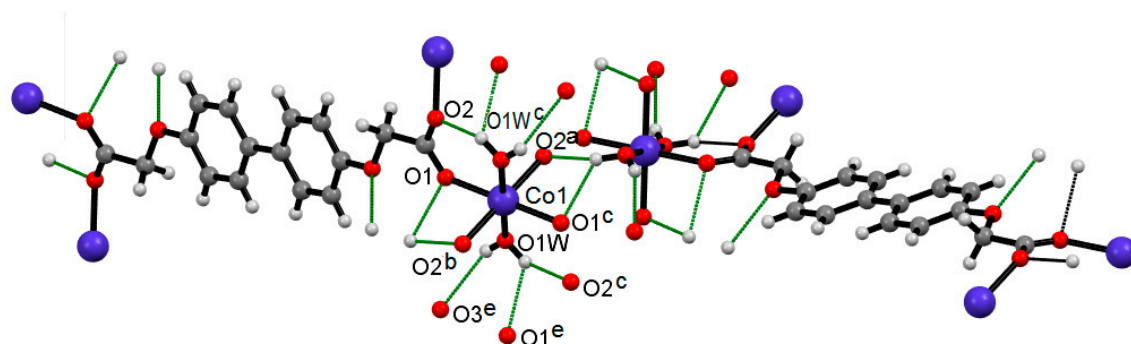

**Figure S3.** H-bond network (green lines) in compound 1. Symmetry codes: (a)  $x, -y+0.5, z+0.5$ ; (b)  $-x, y-0.5, -z+0.5$ ; (c)  $-x, -z+1, -z+1$ ; (e)  $x, -y+0.5, z+0.5$ .

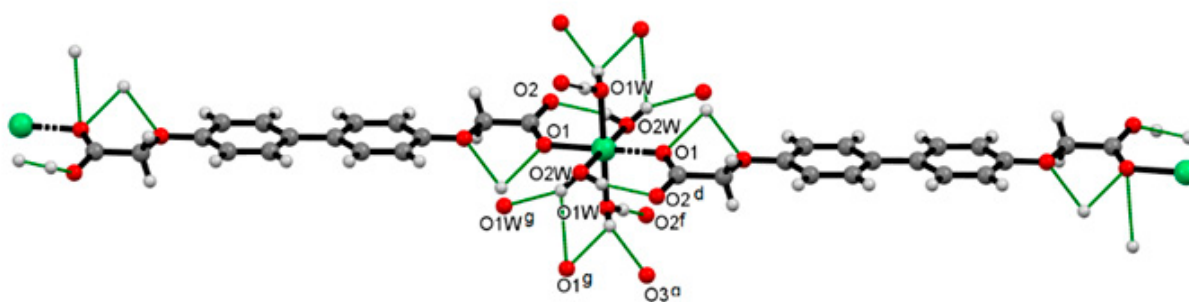

**Figure S4.** H-bond network (green lines) in compound 2. Symmetry codes: (d)  $-x+2, -y+1, z+1$ ; (f)  $-x+2, -y, -z+1$ ; (g)  $-x+1, -y+1, -z+1$ .

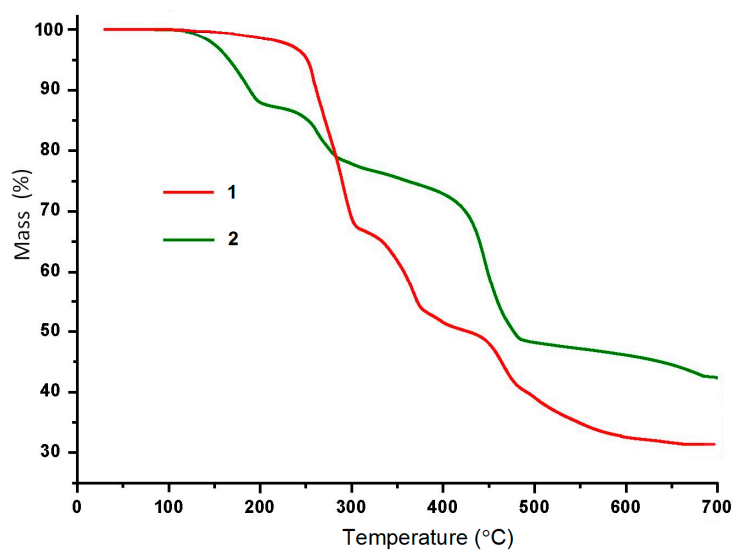

**Figure S5.** TG curves of 1 and 2 recorded in nitrogen atmosphere.
